# Supplementary material for: Blockade of CCR1 induces a phenotypic shift in macrophages and triggers a favorable antilymphoma activity
Source: PubMed Central journal article supplement — Blood Adv. 2023 Jan 13;7(15):3952–67. doi: 10.1182/bloodadvances.2022008722 (PMC10410136; doi:10.1182/bloodadvances.2022008722), 2023-01-13
Supplement: BLOODA_ADV-2022-008722-mmc2.pdf [file BLOODA_ADV-2022-008722-mmc2.pdf]

**Figure S1**

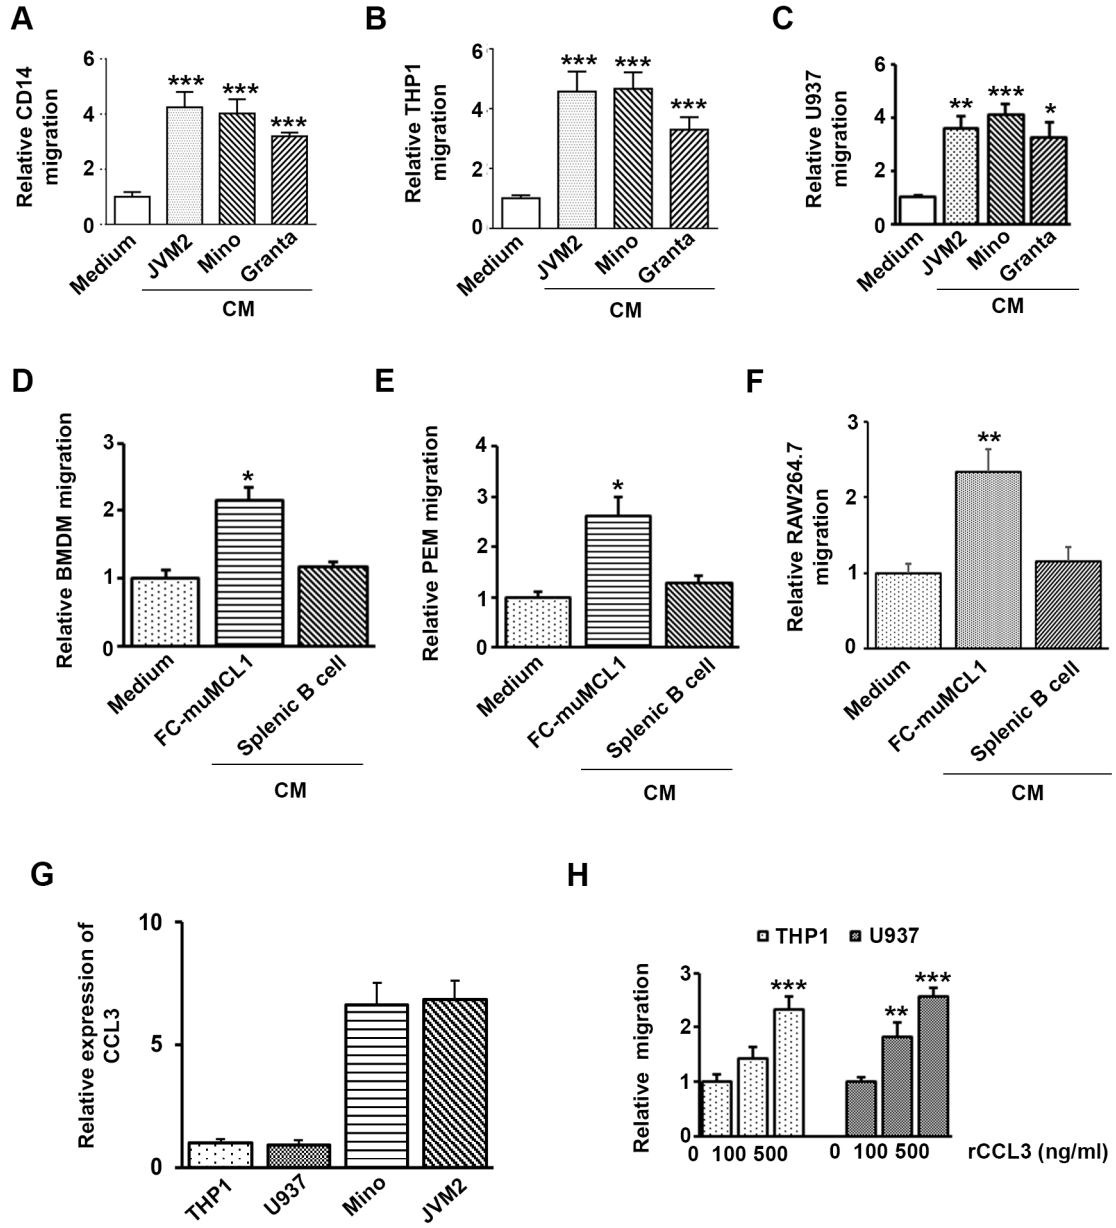

**Figure S2**

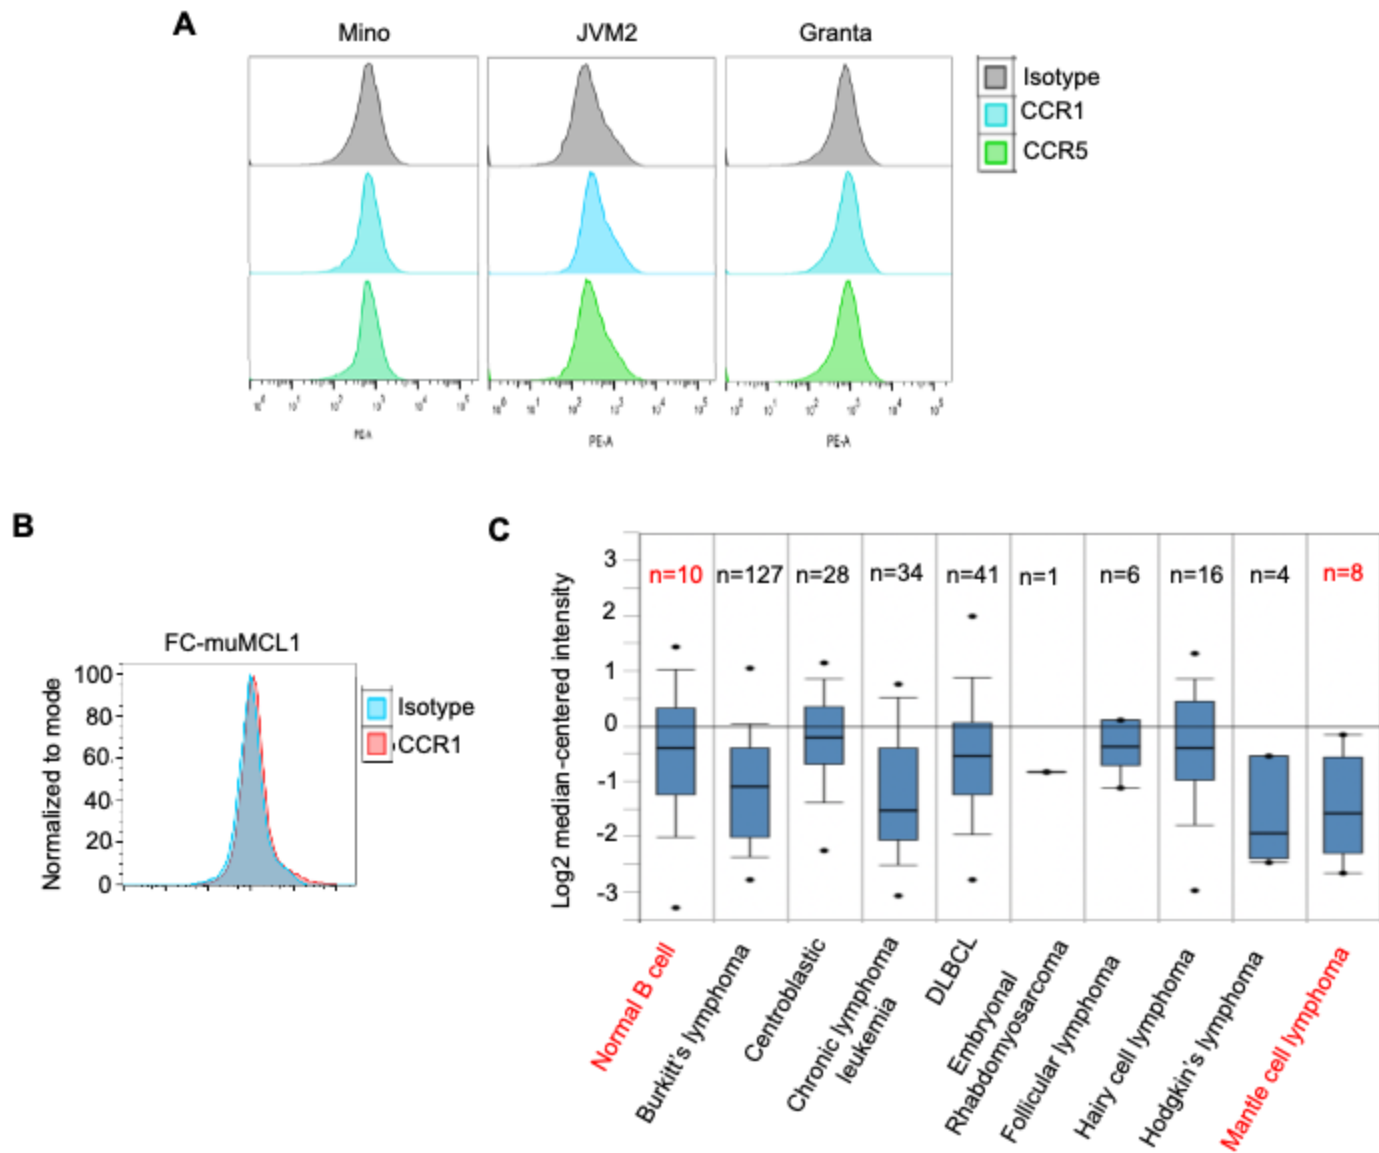

**Figure S3**

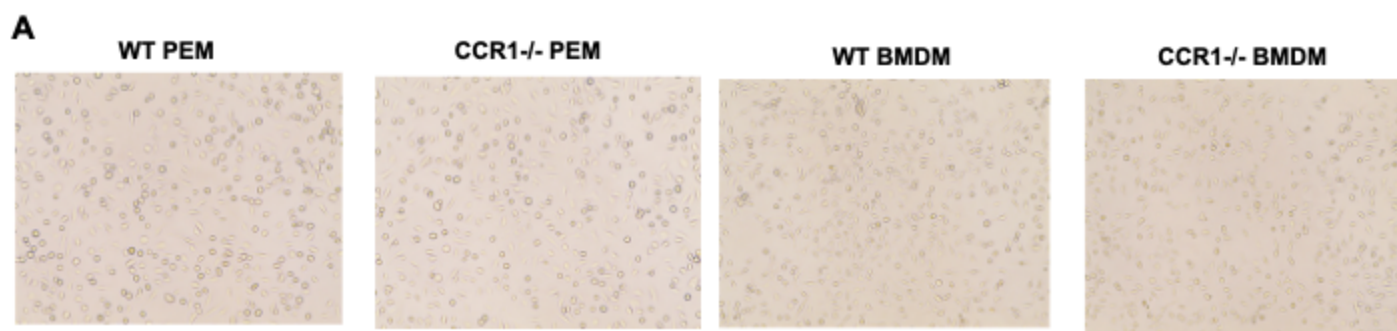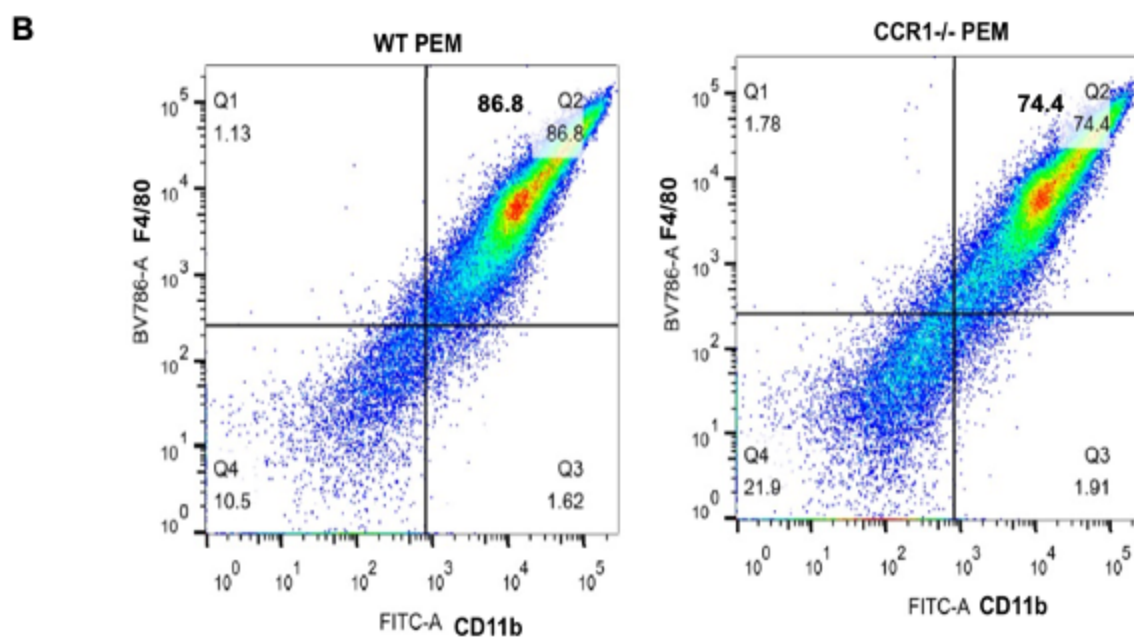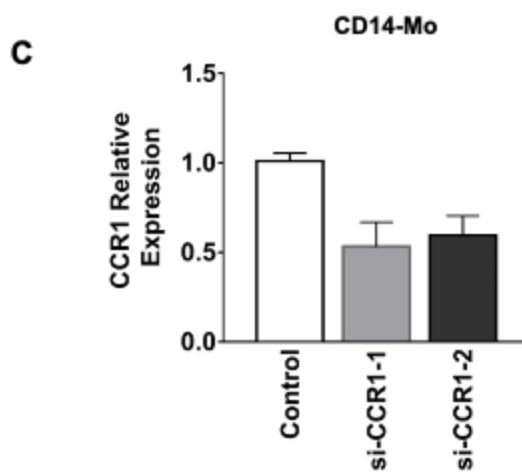

Figure S4

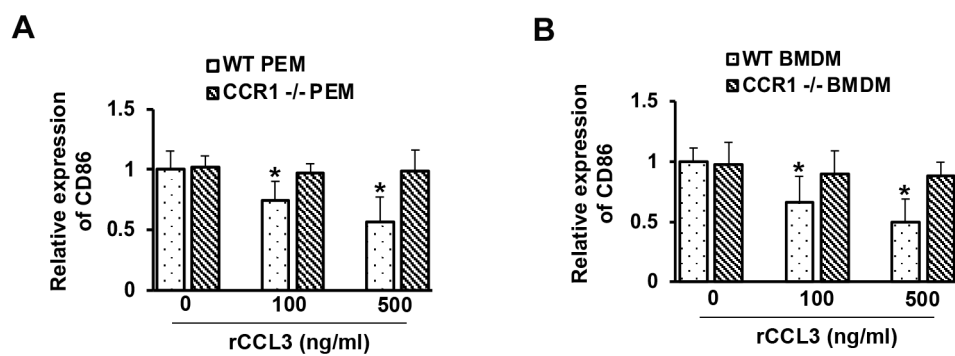

**Figure 5**

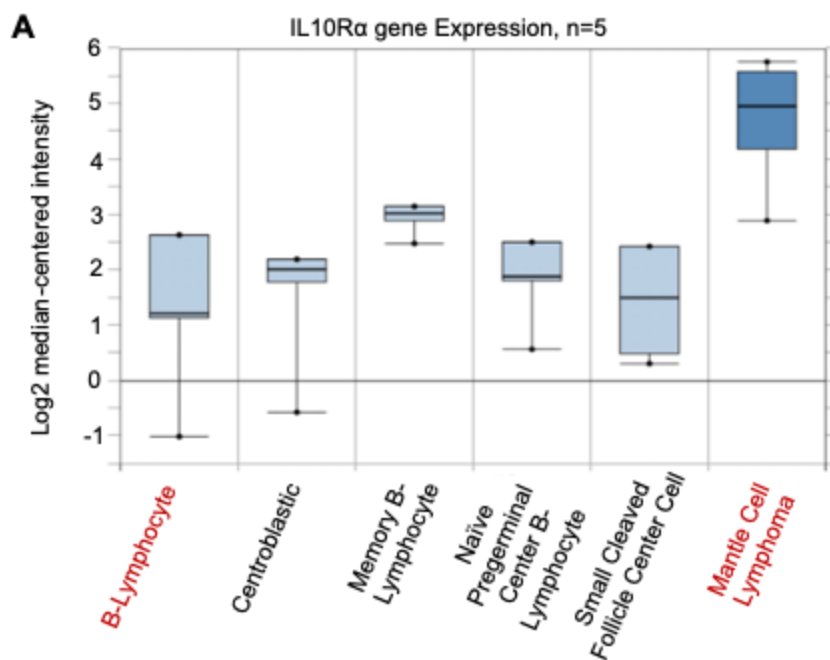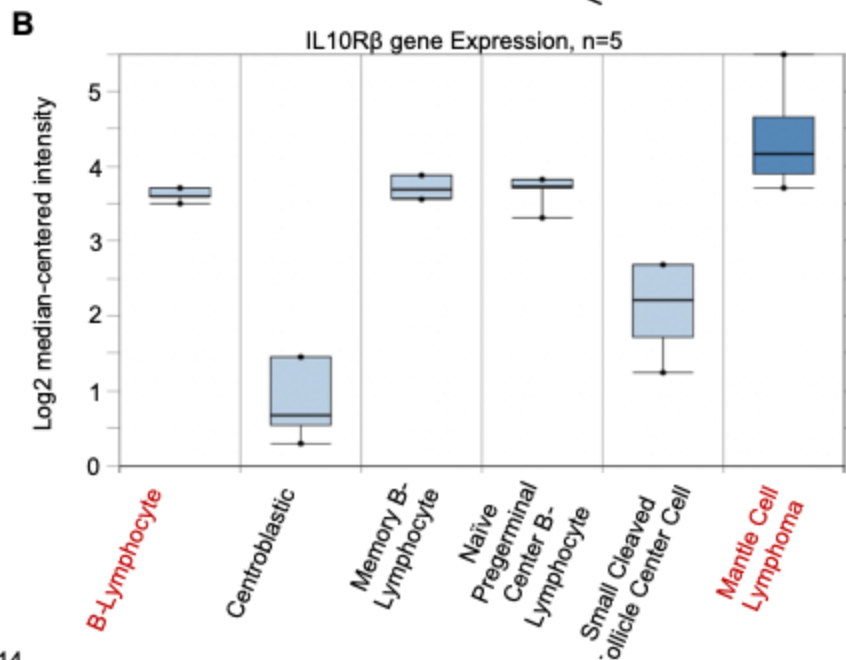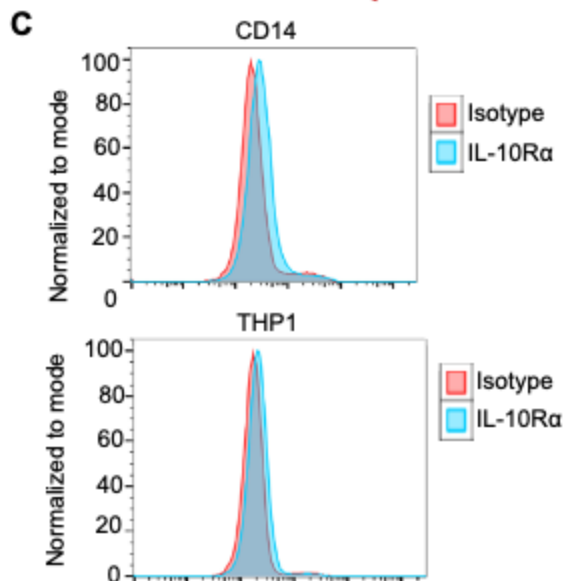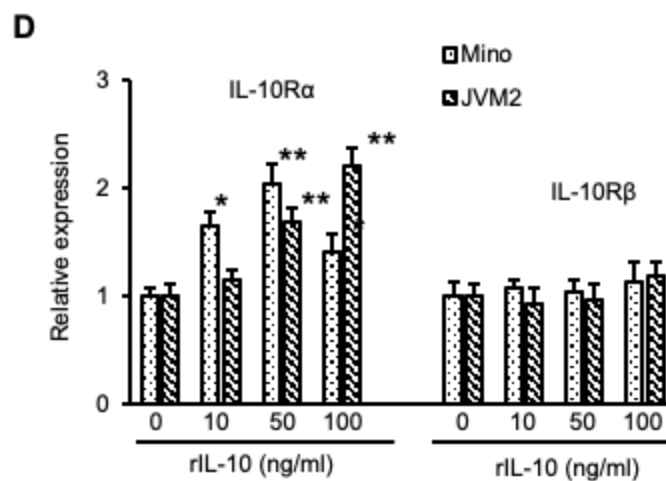

**Figure 6**

**A** JASPAR database predict binding sites on CCL3 promoter

| Matrix ID | Name  | Score   | Relative score | Sequence ID | Start | End  | Strand | Predicted sequence |
|-----------|-------|---------|----------------|-------------|-------|------|--------|--------------------|
| MA0137.3  | STAT1 | 17.1267 | 0.994432864867 | seq1        | 359   | 369  | -      | TTTCTAGGAAA        |
| MA0137.3  | STAT1 | 10.535  | 0.904365664294 | seq1        | 359   | 369  | +      | TTTCTAGGAAA        |
| MA0137.3  | STAT1 | 9.75502 | 0.893708366085 | seq1        | 1024  | 1034 | +      | TTTCTGGCAAA        |
| MA0137.3  | STAT1 | 7.03215 | 0.856503982496 | seq1        | 701   | 711  | +      | CTTATGAGAAG        |
| MA0137.3  | STAT1 | 6.67335 | 0.851601411616 | seq1        | 399   | 409  | +      | TTTCTAGGCAC        |
| MA0137.3  | STAT1 | 6.42874 | 0.848259105628 | seq1        | 1023  | 1033 | -      | TTGCCAGAAAA        |
| MA0137.3  | STAT1 | 5.60335 | 0.836981317486 | seq1        | 997   | 1007 | -      | ATACTGGGAAG        |
| MA0137.3  | STAT1 | 4.73249 | 0.825082068621 | seq1        | 967   | 977  | -      | TTTATAGGCAG        |
| MA0137.3  | STAT1 | 4.57772 | 0.822967464205 | seq1        | 399   | 409  | -      | GTGCCTAGAAA        |
| MA0137.3  | STAT1 | 4.29079 | 0.819046900821 | seq1        | 841   | 851  | +      | ATTCTTGGATA        |
| MA0137.3  | STAT1 | 3.96977 | 0.814660505768 | seq1        | 841   | 851  | -      | TATCCAAGAAT        |
| MA0137.3  | STAT1 | 2.90439 | 0.800103467253 | seq1        | 245   | 255  | -      | CATCAGGGAAT        |
| MA0144.2  | STAT3 | 14.8588 | 0.977562698655 | seq1        | 359   | 369  | -      | TTTCTAGGAAA        |
| MA0144.2  | STAT3 | 11.2844 | 0.934260425347 | seq1        | 359   | 369  | +      | TTTCTAGGAAA        |
| MA0144.2  | STAT3 | 9.88568 | 0.917315339214 | seq1        | 1023  | 1033 | -      | TTGCCAGAAAA        |
| MA0144.2  | STAT3 | 8.97764 | 0.906314781124 | seq1        | 399   | 409  | -      | GTGCCTAGAAA        |
| MA0144.2  | STAT3 | 8.35767 | 0.898804163299 | seq1        | 997   | 1007 | -      | ATACTGGGAAG        |
| MA0144.2  | STAT3 | 8.33808 | 0.89856684616  | seq1        | 701   | 711  | +      | CTTATGAGAAG        |
| MA0144.2  | STAT3 | 7.49031 | 0.888296505317 | seq1        | 1024  | 1034 | +      | TTTCTGGCAAA        |
| MA0144.2  | STAT3 | 7.04255 | 0.882872085497 | seq1        | 245   | 255  | -      | CATCAGGGAAT        |
| MA0144.2  | STAT3 | 5.7205  | 0.86685606691  | seq1        | 360   | 370  | +      | TTCTAGAAAT         |
| MA0144.2  | STAT3 | 4.72779 | 0.854829791816 | seq1        | 967   | 977  | +      | CTGCCTATAAA        |
| MA0144.2  | STAT3 | 4.70663 | 0.854573434773 | seq1        | 841   | 851  | -      | TATCCAAGAAT        |
| MA0144.2  | STAT3 | 4.56273 | 0.852830168758 | seq1        | 841   | 851  | +      | ATTCTTGGATA        |
| MA0144.2  | STAT3 | 3.68747 | 0.84222674226  | seq1        | 5     | 15   | -      | AAGCATGGAAA        |
| MA0144.2  | STAT3 | 3.0285  | 0.834243613082 | seq1        | 543   | 553  | -      | CTGAATGAAAG        |
| MA0144.2  | STAT3 | 2.42992 | 0.826992093329 | seq1        | 399   | 409  | +      | TTTCTAGGCAC        |

**B**

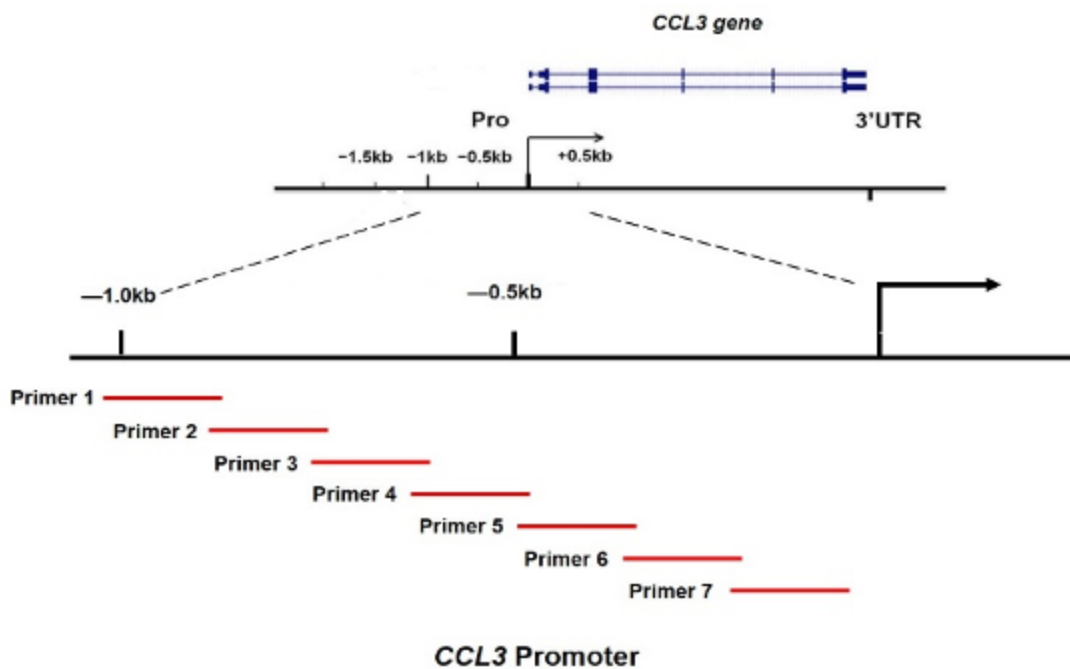

1 **Supplementary Figures Legends.**

2 **Figure S1. In-vitro migration of monocytes and macrophages using MCL-conditioned**

3 **medium.** (A-C) Human monocytic cells, CD14<sup>+</sup> Mo (n=3), THP1, and U937 cells were  
4 incubated with conditioned medium (CM) collected from human MCL cell lines (JVM2, Mino, or  
5 Granta), and migration was assessed by chemotaxis assay as described in the Methods  
6 section. (D-F) Murine BMDM (n=3), PEM (n=3), and RAW264.7 were incubated with CM  
7 collected from FC- muMCL1 and normal mouse splenic B cells (n=2), and the migration was  
8 assessed by chemotaxis assay. \*p<.05, \*\*p<.01, \*p<.001 vs media alone. Experiments were  
9 performed three times independently. (G) The mRNA level of CCL3 in monocytes (THP1 and  
10 U937) and MCL (Mino and JVM2) was assessed by QRT-PCR. The data presented are  
11 representative of three independent experiments. (H) THP1 and U937 –Mo was treated with  
12 recombinant CCL3 (rCCL3) as indicated in the figure, and migration was assessed by  
13 chemotaxis.

14 **Figure S2. CCR1 expression in MCL cells.** (A-C) The expression of CCR1 or CCR5 in Mino  
15 and JVM2 (A) or FC-muMCL1 (B) was measured by flow cytometry. (C) The bioinformatics  
16 analysis of CCR1 expression in normal B cells and MCL.

17 **Figure S3. PEM in CCR1<sup>-/-</sup> and WT mice.** (A) The morphology of BMDM and PEM was  
18 collected from WT and CCR1<sup>-/-</sup> mice (n=4). (B) The expression of CD11b<sup>+</sup> and F4/80 in WT  
19 and CCR1<sup>-/-</sup> C57/BL/6NJ mouse PEM was measured by flow cytometry. The experiment was  
20 performed in 3 mouse tumors and a representative dot plot is shown. (C) CD14<sup>+</sup> cells were  
21 treated with 2 different CCR1 siRNA and expression of CCR1 was measured by QRT-PCR.

22 **Figure S4. Effect of exogenous CCL3 on M1 and M2 markers in WT and CCR1<sup>-/-</sup> PEM.** (A-  
23 B)\_The mRNA level of CD86 was assessed in response to rCCL3 in WT and CCR1<sup>-/-</sup> PEM (A)  
24 or WT and CCR1<sup>-/-</sup> BMDM (B) by qRT-PCR.

25 **Figure S5. Expression of IL-10 and IL-10R $\alpha$  in MCL and macrophages /monocytes.** (A-B)  
26 Bioinformatics analysis of IL-10R $\alpha$  and IL-10R $\beta$  in normal B cells and various NHLs subtypes  
27 were assessed by the Oncomine database. (C) The expression of IL-10R $\alpha$  in CD14-Mo and  
28 THP1- Mo was measured by flow cytometry. The experiment was repeated 2 times with similar  
29 results. (D) Mino and JVM2 were treated with indicated concentrations of rIL-10 for 48 hours,  
30 and the mRNA level of IL-10R $\alpha$  and IL-10R $\beta$  were assessed by QRT-PCR.

31 **Figure S6. Prediction of binding sites on CCL3 promoter.** (A) The predicted binding site of  
32 STAT1 and STAT3 on the CCL3 promoter was obtained from the JASPAR database. (B) Based  
33 on the CCL3 promoter sequence obtained from the UCSC genome browser, 7 pairs of primers  
34 were designed.

35

36

37

38

39

40

41

42

43



44 **Supplementary Tables.**

45 **Table S1.** Antibodies used for Immunofluorescence.

| <b>Antibodies</b> | <b>Company</b>   | <b>Catalog number</b> |
|-------------------|------------------|-----------------------|
| Ly-6C             | Santa Cruz, USA  | sc-271811             |
| Ly-6G/Gr-1        | Santa Cruz, USA  | sc-53515              |
| IL-10             | Proteintech, USA | 60269-1-Ig            |
| CD206             | Abcam, USA       | ab64693               |
| CCR1              | ABclonal, USA    | A18341                |
| IL-10R $\alpha$   | Santa Cruz, USA  | sc-365374             |
| CD19              | Abcam, USA       | ab227019              |
| CD8               | Santa Cruz, USA  | sc-18860              |
| CD11b             | Santa Cruz, USA  | sc-1186               |
| F4/80             | Abcam, USA       | ab111101              |

46

47 **Table S2.** Antibodies used for flow cytometry.

| <b>Antibodies</b> | <b>Company</b>   | <b>Catalog number</b> |
|-------------------|------------------|-----------------------|
| hCCR1             | R&D systems, USA | FAB145P               |
| hCCR4             | R&D systems USA  | FAB1567P              |
| hCCR5             | R&D systems, USA | FAB182P               |
| mCCR1             | R&D systems, USA | FAB6280P              |
| hIL-10R $\alpha$  | R&D systems, USA | FAB5986P              |
| mF4/80            | Biolegend        | 123141                |
| mCD11b            | Biolegend        | 101206                |

48

49

50 **Table S3.** Primer sequences for qRT-PCR.

| <b>qRT-PCR primers</b> | <b>Forward</b>          | <b>Reverse</b>          |
|------------------------|-------------------------|-------------------------|
| hIL-10                 | GACTTTAAGGGTTACCTGGGTTG | TCACATGCGCCTTGATGTCTG   |
| hCCL3                  | AGTTCTCTGCATCACTTGCTG   | CGGCTTCGCTTGGTTAGGAA    |
| hCD206                 | ACCTCACAAGTATCCACACCATC | CTTTCATCACCACACAATCCTC  |
| hCD80                  | CTGCCTGACCTACTGCTTTG    | GGCGTACACTTTCCTTCTC     |
| IL-10R $\alpha$        | CCTCCGTCTGTGTGGTTTGAA   | CACTGCGGTAAGGTCATAGGA   |
| IL-10R $\beta$         | ATGAGCATTCACTGGGTAAAC   | TTTTAGGGGCTAAGAAACGCAT  |
| hGAPDH                 | ATCACCATCTTCCAGGAGCG    | CAAATGAGCCCCAGCCTTC     |
| mCD206                 | CTCTGTTTCAGCTATTGGACGC  | CGGAATTTCTGGGATTCAGCTTC |
| mCD80                  | CCCCAGAAGACCCTCCTGATAG  | CCGAAGGTAAGGCTGTTGTTTG  |
| mIL-10                 | AAGGCAGTGGAGCAGGTGAA    | CCAGCAGACTCAATACACAC    |
| mCCL3                  | ACTGCCTGCTGCTTCTCCTACA  | ATGACACCTGGCTGGGAGCAAA  |
| mCCR1                  | GCCAAAAGACTGCTGTAAGAGCC | GCTTTGAAGCCTCCTATGCTGC  |
| mGAPDH                 | CCCCTCTTCCACCTTCGATG    | GTCCACCACCCTGTTGCTGTAG  |

51

52 **Table S4.** Primer sequences for ChIP assay

| <b>CCL3 promoter primers</b> | <b>Forward</b>           | <b>Reverse</b>            |
|------------------------------|--------------------------|---------------------------|
| Primer 1                     | ATGCTTAGGGTTGGCAAGGA     | AGTCTCTAAAATGAATGAAGTGGCA |
| Primer 2                     | AAGCATATTTATGCCACTTCATT  | CCCAAATATGGAGCCATCTTCAA   |
| Primer 3                     | GGCTCCATATTTGGGTTGTTTCC  | TAGTGACTAGGGCGCTGTGT      |
| Primer 4                     | GCGCCCTAGTCACTACATGA     | CCACAGGGATAGGGTTGATGG     |
| Primer 5                     | CCCATCAACCCTATCCCTGTG    | GGGAAATGGTTTCTCCTGTGAG    |
| Primer 6                     | TCTTCACACTCACAGGAGAAACCA | GGGGGTGAGGAGGGAAATTTTAA   |
| Primer 7                     | CTCCTCACCCCCAGATTCCATT   | CCTCCATTTACCTCTTCCTAATCT  |

53
